# Supplementary material for: Effect of OH substitution in 3-benzylchroman-4-ones: crystallographic, CSD, DFT, FTIR, Hirshfeld surface, and energy framework analysis
Source: Royal Society of Chemistry journal article supplement (doi:10.1039/d1ra02245h), 2021-01-01
Supplement: d1ra02245h1.pdf [file d1ra02245h1.pdf]

### Supplementary Information

**Table S1.** Fractional Atomic Coordinates ( $\times 10^4$ ) and Equivalent Isotropic Displacement Parameters ( $\text{\AA}^2 \times 10^3$ ) for HIF-4.  $U_{\text{eq}}$  is defined as 1/3 of the trace of the orthogonalised  $U_{ij}$  tensor.

| Atom | <i>x</i>   | <i>y</i>   | <i>z</i>   | $U(\text{eq})$ |
|------|------------|------------|------------|----------------|
| C10  | 1404.0(14) | 8867.8(19) | 1822.1(13) | 47.7(4)        |
| C3   | 3433.8(15) | 9882.5(19) | 2668.0(14) | 49.4(4)        |
| C9   | 1614.8(15) | 8949.7(19) | 825.0(13)  | 48.4(4)        |
| C1'  | 5422.7(15) | 8958.8(19) | 2662.6(13) | 48.0(4)        |
| O1   | 2561.7(11) | 9652.7(15) | 700.7(10)  | 60.5(4)        |
| O2   | 2153.3(12) | 9330.0(19) | 3712.6(11) | 77.0(5)        |
| C2'  | 6299.4(15) | 9565(2)    | 3548.5(14) | 50.0(4)        |
| O3   | 6044.0(14) | 9717(2)    | 4489.1(12) | 79.9(5)        |
| C4   | 2305.9(15) | 9379(2)    | 2818.6(14) | 51.1(4)        |
| C3'  | 7371.3(17) | 9972(2)    | 3450.6(17) | 59.8(5)        |
| C11  | 4263.1(15) | 8524(2)    | 2781.0(15) | 53.6(4)        |
| C6'  | 5660.4(19) | 8786(2)    | 1691.2(16) | 65.8(5)        |
| C8   | 849.3(17)  | 8289(2)    | -101.5(15) | 63.0(5)        |
| C5   | 379.3(16)  | 8163(2)    | 1856.2(17) | 66.4(6)        |
| C7   | -126.1(19) | 7589(3)    | -39.3(19)  | 74.7(6)        |
| C4'  | 7576(2)    | 9785(2)    | 2475(2)    | 73.5(6)        |
| C5'  | 6727(2)    | 9196(3)    | 1591.6(19) | 80.7(7)        |
| C6   | -383.6(18) | 7525(3)    | 927(2)     | 78.8(7)        |
| C2   | 3153.3(16) | 10646(2)   | 1574.9(15) | 56.9(5)        |

**Table S2.** Anisotropic Displacement Parameters ( $\text{\AA}^2 \times 10^3$ ) for HIF-4. The Anisotropic displacement factor exponent takes the form:  $-2\pi^2[h^2a^{*2}U_{11}+2hka^*b^*U_{12}+\dots]$ .

| Atom | $U_{11}$ | $U_{22}$  | $U_{33}$  | $U_{23}$ | $U_{13}$ | $U_{12}$  |
|------|----------|-----------|-----------|----------|----------|-----------|
| C10  | 39.9(9)  | 52(1)     | 48.1(9)   | 2.9(7)   | 9.3(7)   | 1.4(7)    |
| C3   | 43.7(10) | 48.1(9)   | 50.1(9)   | -7.2(7)  | 5.9(7)   | -4.1(7)   |
| C9   | 45.1(10) | 46.5(9)   | 49.2(9)   | 0.7(7)   | 8.9(7)   | 1.6(7)    |
| C1'  | 48.5(10) | 44.4(9)   | 49.0(9)   | 1.7(7)   | 12.5(7)  | 4.1(7)    |
| O1   | 56.4(8)  | 75.0(9)   | 48.9(7)   | 2.9(6)   | 14.8(6)  | -10.6(7)  |
| O2   | 66.6(10) | 117.0(13) | 47.2(8)   | -5.5(8)  | 17.8(6)  | -6.1(9)   |
| C2'  | 45.7(10) | 52.8(10)  | 50.0(9)   | -0.6(8)  | 12.8(7)  | 3.8(8)    |
| O3   | 60.9(9)  | 125.5(14) | 51.6(8)   | -17.3(8) | 15.4(7)  | -5.7(9)   |
| C4   | 48.3(10) | 56.4(10)  | 46.5(9)   | -0.9(8)  | 11.9(7)  | 1.8(8)    |
| C3'  | 45.2(11) | 51.7(11)  | 78.4(13)  | -0.2(9)  | 13.8(9)  | 2.7(8)    |
| C11  | 47.1(10) | 48.5(10)  | 59.3(10)  | 3.6(8)   | 8.5(8)   | -0.9(8)   |
| C6'  | 71.3(14) | 72.9(13)  | 51.1(10)  | -2.4(9)  | 16.2(9)  | 7.6(11)   |
| C8   | 60.7(13) | 67.1(12)  | 51.6(10)  | -7.2(9)  | 4.3(9)   | 3(1)      |
| C5   | 46.8(11) | 82.2(15)  | 67.5(13)  | 14.4(11) | 14.3(9)  | -2.7(10)  |
| C7   | 60.9(14) | 71.6(14)  | 74.1(14)  | -5.0(11) | -3.4(10) | -7.5(11)  |
| C4'  | 60.2(14) | 70.4(14)  | 101.0(18) | 16.8(13) | 41.1(13) | 3.9(11)   |
| C5'  | 86.4(17) | 99.4(18)  | 70.0(14)  | 8.9(13)  | 43.9(13) | 13.1(14)  |
| C6   | 42.6(12) | 80.9(15)  | 99.5(18)  | 12.2(13) | 3.5(11)  | -16.4(10) |
| C2   | 49.7(11) | 50.5(10)  | 65.6(11)  | 4.8(8)   | 11.4(8)  | -6.0(8)   |

**Table S3.** Hydrogen Atom Coordinates ( $\text{\AA}\times 10^4$ ) and Isotropic Displacement Parameters ( $\text{\AA}^2\times 10^3$ ) for HIF-4.

| Atom | <i>x</i> | <i>y</i>  | <i>z</i> | U(eq)  |
|------|----------|-----------|----------|--------|
| H3   | 3807.1   | 10610.63  | 3239.01  | 59     |
| H3'  | 7949.56  | 10369.63  | 4045.4   | 72     |
| H11A | 4393.23  | 8063.55   | 3488.86  | 64     |
| H11B | 3891.6   | 7787.47   | 2228.73  | 64     |
| H6'  | 5090.07  | 8385.38   | 1091.67  | 79     |
| H8   | 1005.41  | 8326.52   | -760.54  | 76     |
| H5   | 209.97   | 8123.06   | 2508.88  | 80     |
| H7   | -631.78  | 7143.81   | -660.18  | 90     |
| H4'  | 8294.62  | 10059.96  | 2410.16  | 88     |
| H5'  | 6869.05  | 9073.43   | 930.85   | 97     |
| H6   | -1063.02 | 7056.93   | 953.47   | 95     |
| H2A  | 2663.81  | 11511.78  | 1562.11  | 68     |
| H2B  | 3871.88  | 10993.8   | 1469.89  | 68     |
| O3H  | 6690(20) | 10030(30) | 5070(20) | 102(8) |

**Table S4.** Fractional Atomic Coordinates ( $\times 10^4$ ) and Equivalent Isotropic Displacement Parameters ( $\text{\AA}^2 \times 10^3$ ) for HIF-13.  $U_{\text{eq}}$  is defined as 1/3 of the trace of the orthogonalised  $U_{ij}$  tensor.

| Atom | $x$     | $y$        | $z$     | $U(\text{eq})$ |
|------|---------|------------|---------|----------------|
| O4'  | 3619(3) | 2867.1(7)  | 8429(2) | 68.5(6)        |
| C1'  | 6603(4) | 3480.9(8)  | 5669(3) | 43.1(6)        |
| O2   | 8603(3) | 4027.9(7)  | 1943(3) | 73.2(7)        |
| C3'  | 3669(4) | 3065.9(9)  | 5614(3) | 42.7(7)        |
| C2'  | 4701(4) | 3275.8(8)  | 4748(3) | 39.6(6)        |
| C3   | 6973(4) | 4180.4(9)  | 3828(3) | 42.8(6)        |
| C4   | 7834(4) | 4321.7(10) | 2554(3) | 46.8(7)        |
| C11  | 7741(4) | 3688.7(9)  | 4711(3) | 52.1(7)        |
| C10  | 7634(3) | 4839.4(10) | 2063(3) | 43.4(7)        |
| C4'  | 4529(4) | 3066.4(9)  | 7452(3) | 47.7(7)        |
| O1   | 6590(3) | 5048.5(6)  | 4348(3) | 61.2(6)        |
| C9   | 6998(4) | 5174.9(10) | 2967(3) | 48.3(7)        |
| C2   | 7376(4) | 4589.7(9)  | 5153(3) | 53.1(7)        |
| C6   | 7759(4) | 5494.1(12) | 180(4)  | 63.0(8)        |
| C5'  | 6380(4) | 3275.2(10) | 8402(3) | 54.6(8)        |
| C7   | 7077(4) | 5812.8(11) | 1070(4) | 65.6(9)        |
| C13  | 1758(5) | 2627.7(11) | 7528(4) | 71.6(9)        |
| C8   | 6702(4) | 5658.8(10) | 2452(4) | 59.6(8)        |
| C5   | 8005(4) | 5011.1(11) | 659(4)  | 55.0(8)        |
| O2'  | 3970(2) | 3296.1(6)  | 2943(2) | 51.7(5)        |
| C12  | 2015(4) | 3110.6(11) | 1908(3) | 64.2(8)        |
| C6'  | 7376(4) | 3475.3(10) | 7498(4) | 55.8(8)        |

**Table S5.** Anisotropic Displacement Parameters ( $\text{\AA}^2 \times 10^3$ ) for HIF-13. The Anisotropic displacement factor exponent takes the form:  $-2\pi^2[h^2a^*2U_{11}+2hka^*b^*U_{12}+\dots]$ .

| Atom | $U_{11}$ | $U_{22}$ | $U_{33}$ | $U_{23}$ | $U_{13}$ | $U_{12}$  |
|------|----------|----------|----------|----------|----------|-----------|
| O4'  | 88.1(16) | 72.3(14) | 46.0(12) | 0.7(10)  | 29.9(12) | -22.0(12) |
| C1'  | 40.3(15) | 32.7(14) | 50.0(17) | 4.5(12)  | 13.6(13) | 3.3(12)   |
| O2   | 96.3(17) | 56.0(14) | 84.7(16) | -2.0(11) | 55.4(14) | 13.9(11)  |
| C3'  | 44.6(16) | 36.8(15) | 42.7(16) | -1.1(11) | 15.0(13) | -3.2(12)  |
| C2'  | 41.5(15) | 33.5(14) | 36.6(15) | 1.9(11)  | 10.1(12) | 2.6(12)   |
| C3   | 30.8(14) | 42.0(16) | 52.5(16) | 1.3(12)  | 15.2(12) | -0.6(11)  |
| C4   | 40.2(16) | 45.0(18) | 52.9(17) | -7.6(13) | 17.9(14) | -1.0(13)  |
| C11  | 37.1(15) | 42.4(17) | 71.9(19) | 6.2(14)  | 19.0(14) | -0.9(12)  |
| C10  | 30.8(14) | 47.4(17) | 52.9(17) | -0.3(13) | 19.1(13) | -1.7(12)  |
| C4'  | 62.2(19) | 36.6(15) | 42.8(17) | 4.5(12)  | 21.2(15) | 0.5(13)   |
| O1   | 79.0(14) | 43.3(12) | 84.4(14) | 9.3(10)  | 57.1(12) | 7(1)      |
| C9   | 38.8(15) | 46.2(17) | 63.6(19) | 7.3(14)  | 25.6(14) | -4.1(13)  |
| C2   | 59.5(18) | 43.4(17) | 65.5(19) | 8.3(14)  | 35.6(16) | 3.1(14)   |
| C6   | 48.4(18) | 74(2)    | 64(2)    | 19.8(17) | 21.6(16) | 0.6(16)   |
| C5'  | 57.5(19) | 50.2(18) | 38.9(16) | 1.8(13)  | 4.7(14)  | -4.7(14)  |
| C7   | 47.9(19) | 55(2)    | 87(2)    | 20.4(18) | 23.0(17) | 0.0(15)   |
| C13  | 86(2)    | 67(2)    | 69(2)    | -5.4(16) | 40.4(19) | -25.9(18) |
| C8   | 55.8(19) | 45.0(19) | 86(2)    | 6.3(15)  | 38.1(17) | 2.4(14)   |
| C5   | 44.8(17) | 64(2)    | 57.4(18) | 0.6(15)  | 23.7(14) | -2.5(14)  |
| O2'  | 50.3(12) | 61.1(12) | 39.6(11) | -2.0(8)  | 15.7(9)  | -10.9(9)  |
| C12  | 59.3(19) | 82(2)    | 39.5(16) | -2.5(14) | 10.0(14) | -14.7(16) |
| C6'  | 45.1(17) | 42.6(17) | 62(2)    | 3.7(14)  | 6.2(15)  | -3.6(13)  |

**Table S6.** Hydrogen Atom Coordinates ( $\text{\AA}\times 10^4$ ) and Isotropic Displacement Parameters ( $\text{\AA}^2\times 10^3$ ) for HIF-13.

| Atom | <i>x</i> | <i>y</i> | <i>z</i> | U(eq) |
|------|----------|----------|----------|-------|
| H3'  | 2412.43  | 2925.89  | 4970.68  | 51    |
| H3   | 5513.44  | 4153.32  | 3146.25  | 51    |
| H11A | 7682.49  | 3456.77  | 3811.5   | 62    |
| H11B | 9139.41  | 3724.23  | 5548.3   | 62    |
| H2A  | 6789.86  | 4505.06  | 5953.84  | 64    |
| H2B  | 8815.45  | 4620.87  | 5852.05  | 64    |
| H6   | 8048.74  | 5605.09  | -734.65  | 76    |
| H5'  | 6950.68  | 3281.17  | 9634.9   | 65    |
| H7   | 6867.47  | 6139.26  | 724.15   | 79    |
| H13A | 771.83   | 2857.79  | 6783.49  | 107   |
| H13B | 1340.04  | 2493.43  | 8375.63  | 107   |
| H13C | 1895.84  | 2368.87  | 6812.63  | 107   |
| H8   | 6248.6   | 5879.7   | 3044.13  | 72    |
| H5   | 8427.65  | 4792.65  | 37.17    | 66    |
| H12A | 1972.86  | 2769.62  | 2165.78  | 96    |
| H12B | 1685.94  | 3150.22  | 672.66   | 96    |
| H12C | 1061.55  | 3286.38  | 2185.77  | 96    |
| H6'  | 8632.8   | 3613.95  | 8150.54  | 67    |

**Table S7.** Molecular pairs and interaction energies (kJ/mole) obtained from energy framework calculations for seven 3-benzylchroman-4-one structures. N is the number of pairs, and R is the distance between molecular centroids (Å).  $E_{ele}$ ,  $E_{pol}$ ,  $E_{disp}$ , and  $E_{rep}$  represent the energy components of electrostatic, polarization, dispersion, and exchange-repulsion, respectively, and  $E_{tot}$  is calculated as  $E_{tot} = k_{ele}E_{ele} + k_{pol}E_{pol} + k_{disp}E_{disp} + k_{rep}E_{rep}$ . Total energies are reported only for two benchmarked energy models, are the sum of the four energy components, scaled appropriately. The energy model CE-B3LYP ... B3LYP /6-31G (d, p) is used to compare electron densities with the scale factors 1.057 ( $k_{ele}$ ), 0.740 ( $k_{pol}$ ), 0.871 ( $k_{disp}$ ), and 0.618 ( $k_{rep}$ ).

| N      | Symop                 | R     | E_ele  | E_pol | E_dis | E_rep | E_tot |
|--------|-----------------------|-------|--------|-------|-------|-------|-------|
| HIF-4  |                       |       |        |       |       |       |       |
| 1      | -x, -y, -z            | 7.36  | -100.5 | -26.0 | -25.7 | 100.9 | -85.5 |
| 1      | -x, y+1/2, -z+1/2     | 5.59  | -11.9  | -1.7  | -52.0 | 31.6  | -39.6 |
| 0      | -x, -y, -z            | 8.68  | -0.8   | -0.7  | -31.2 | 15.2  | -19.1 |
| 0      | -x, -y, -z            | 7.56  | -4.1   | -1.0  | -20.1 | 12.1  | -15.1 |
| 1      | x, -y+1/2, z+1/2      | 7.08  | -0.5   | -1.8  | -14.4 | 6.4   | -10.4 |
| HIF-13 |                       |       |        |       |       |       |       |
| N      | -x, -y, -z            | 5.78  | -17.0  | -2.6  | -54.5 | 37.8  | -44.0 |
| 1      | -x, -y, -z            | 8.38  | -5.2   | -1.6  | -51.5 | 25.2  | -35.9 |
| 1      | -x, -y, -z            | 7.57  | -9.2   | -1.5  | -48.2 | 31.2  | -33.6 |
| 1      | x, y, z               | 7.39  | -7.9   | -2.3  | -17.8 | 8.3   | -20.4 |
| 1      | -x, -y, -z            | 12.15 | -7.2   | -1.2  | -15.2 | 12.0  | -14.3 |
| 1      | x, y, z               | 8.36  | -1.7   | -2.5  | -17.7 | 8.6   | -13.8 |
| AFAYIR |                       |       |        |       |       |       |       |
| 2      | x+1/2, -y+1/2, z+1/2  | 9.69  | -56.8  | -18.0 | -17.7 | 55.8  | -54.3 |
| 1      | -x, -y, -z            | 5.20  | -16.1  | -5.3  | -55.1 | 28.1  | -51.6 |
| 2      | x, y, z               | 5.26  | -45.8  | -6.4  | -61.7 | 126.9 | -28.4 |
| 1      | -x, -y, -z            | 5.66  | -7.3   | -1.6  | -43.6 | 34.3  | -25.6 |
| 2      | -x+1/2, y+1/2, -z+1/2 | 9.35  | -4.8   | -1.1  | -16.2 | 7.0   | -15.6 |
| 2      | x+1/2, -y+1/2, z+1/2  | 9.13  | -12.6  | -3.1  | -24.6 | 38.1  | -13.5 |
| AFEWAL |                       |       |        |       |       |       |       |
| 1      | -x, -y, -z            | 6.90  | -20.1  | -8.4  | -59.5 | 59.5  | -42.6 |

|        |                       |       |       |      |       |      |       |
|--------|-----------------------|-------|-------|------|-------|------|-------|
| 1      | x, y, z               | 6.58  | -12.5 | -8.0 | -41.9 | 31.9 | -35.9 |
| 1      | -x, -y, -z            | 5.78  | -7.1  | -1.5 | -51.8 | 33.1 | -33.4 |
| 2      | -x+1/2, y+1/2, -z+1/2 | 10.52 | -3.3  | -0.9 | -11.2 | 5.4  | -10.5 |
| LERYEO |                       |       |       |      |       |      |       |
| 2      | x, y, z               | 5.45  | -11.3 | -3.0 | -51.9 | 26.2 | -43.2 |
| 1      | -x+1/2, -y+1/2, -z    | 5.85  | -12.9 | -2.4 | -48.1 | 36.5 | -34.7 |
| 1      | -x+1/2, -y+1/2, -z    | 5.76  | -8.3  | -1.1 | -42.6 | 20.5 | -34.0 |
| 2      | -x+1/2, y+1/2, -z+1/2 | 6.30  | -10.5 | -4.5 | -37.1 | 23.0 | -32.5 |
| 1      | -x, -y, -z            | 12.01 | -3.9  | -2.1 | -14.2 | 4.0  | -15.5 |
| ECUFUG |                       |       |       |      |       |      |       |
| 2      | x, y, z               | 4.65  | -9.3  | -2.4 | -57.5 | 30.6 | -42.8 |
| 2      | x+1/2, -y+1/2, z+1/2  | 5.50  | -5.9  | -1.3 | -35.0 | 17.9 | -26.6 |
| 2      | x+1/2, -y+1/2, z+1/2  | 6.38  | -7.1  | -2.8 | -22.4 | 13.6 | -20.6 |
| ECUFOA |                       |       |       |      |       |      |       |
| 1      | -x, -y, -z            | 6.66  | -25.5 | -6.1 | -44.0 | 34.5 | -48.5 |
| 1      | -x, -y, -z            | 5.22  | -15.5 | -3.2 | -59.7 | 43.8 | -43.6 |
| 2      | -x+1/2, y+1/2, -z+1/2 | 10.38 | -38.0 | -8.8 | -16.5 | 36.2 | -38.7 |
| 1      | -x, -y, -z            | 5.85  | -12.5 | -2.6 | -53.7 | 38.6 | -38.0 |
| 1      | -x, -y, -z            | 7.17  | -9.4  | -4.0 | -44.1 | 25.6 | -35.4 |
| 2      | x, y, z               | 6.48  | -11.0 | -4.7 | -38.4 | 24.5 | -33.5 |



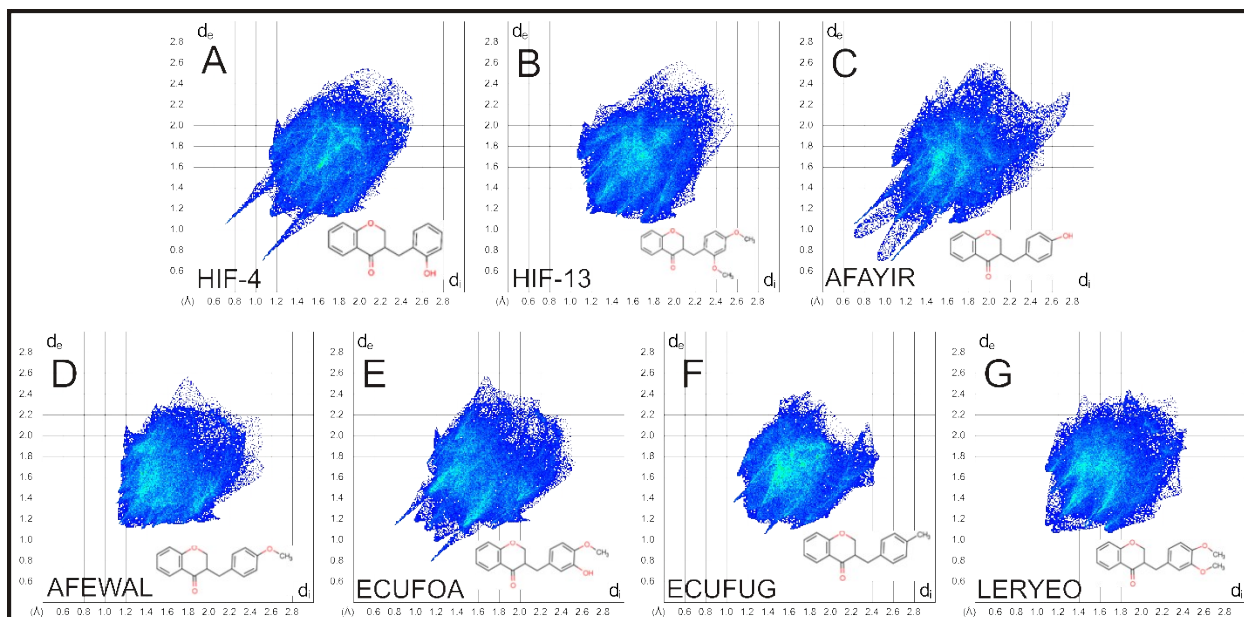

| H | LERYEO |       |       |
|---|--------|-------|-------|
|   | O-all  | C-all | H-all |
|   | 12.6   | 10.6  | 76.8  |
|   | 9.6    | 11.9  | 78.5  |
|   | 11.2   | 11.6  | 77.2  |
|   | 12.6   | 11.8  | 75.6  |
|   | 8.5    | 12.5  | 79.1  |
|   | 11.0   | 13.2  | 75.8  |
|   | 9.9    | 13.5  | 76.6  |

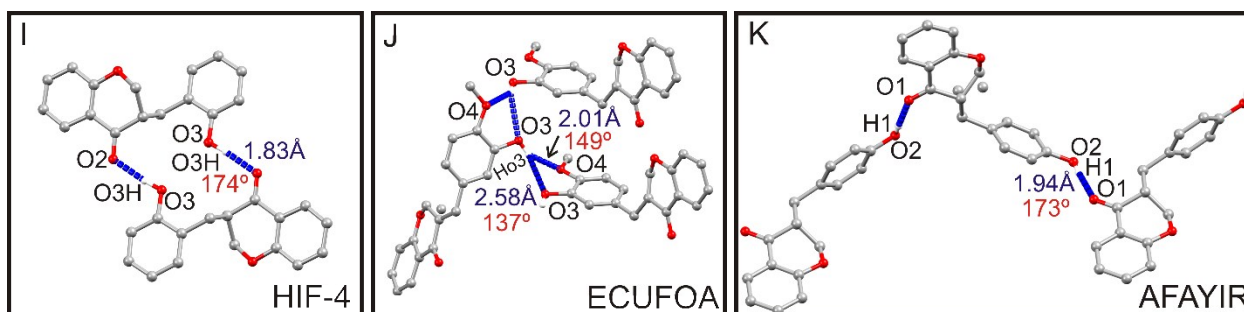

**Figure S1.** Intermolecular interactions of 3-benzylchroman-4-ones. 2D finger plot of full for (A) HIF-4, (B) HIF-13, (C) AFAYIR, (D) AFEWAL (E) ECUFOA, (F) ECUFUG, and (G) LERYEO. The chemical diagram of each structure is shown in the inset. (H) Percentage of contribution to the Hirshfeld surface area for carbon, oxygen, and hydrogen contacts for seven 3-benzylchroman-4-ones structures. O-H...O intermolecular interactions of HIF-4 (I), ECUFOA (J), and AFAYIR (K) are shown. The hydrogen bonds are shown in dotted lines, and the corresponding atoms, distance, and angles are marked. The hydrogen atoms, which are not involved in the O-H...O interactions, are omitted for clarity.

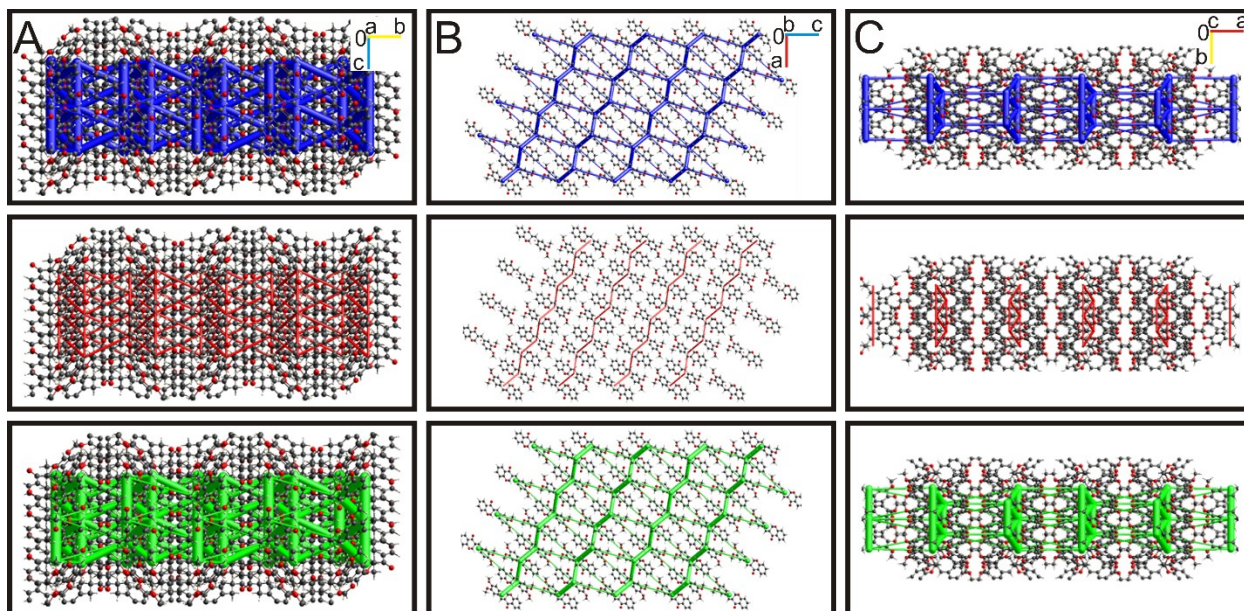

**Figure S2.** Energy frameworks for LERYEO. The molecular arrangement of LERYEO is viewed down the  $a$  (A, D, and G),  $b$  (B, E, and H), and  $c$  (C, F, and I) directions. The models are shown in ball-and-stick representation. The total interaction energies (A-C), electrostatic terms (D-F), and dispersion energy terms (G-I) are shown in blue, red, and green colors, respectively.

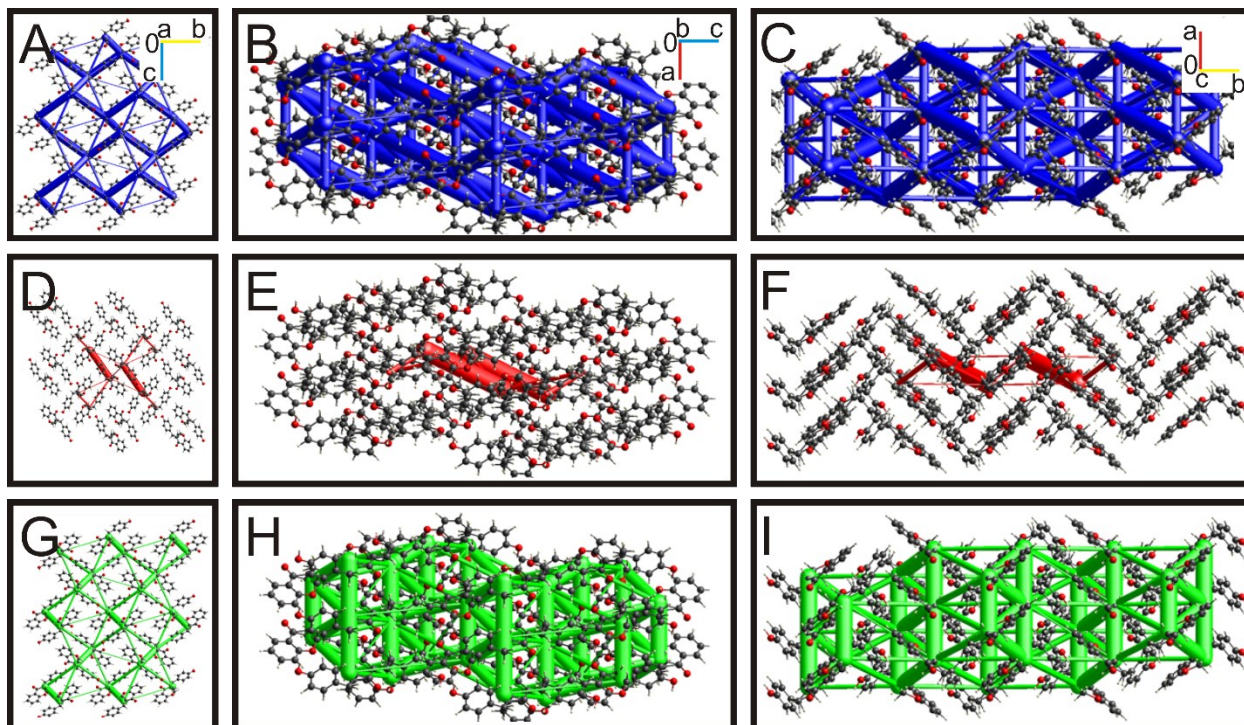

**Figure S3.** Energy frameworks for AFAYIR. The molecular arrangement of AFAYIR is viewed down the  $a$  (A, D, and G),  $b$  (B, E, and H), and  $c$  (C, F, and I) directions. The models are shown in ball-and-stick representation. The total interaction energies (A-C), electrostatic terms (D-F), and dispersion energy terms (G-I) are shown in blue, red, and green colors, respectively.

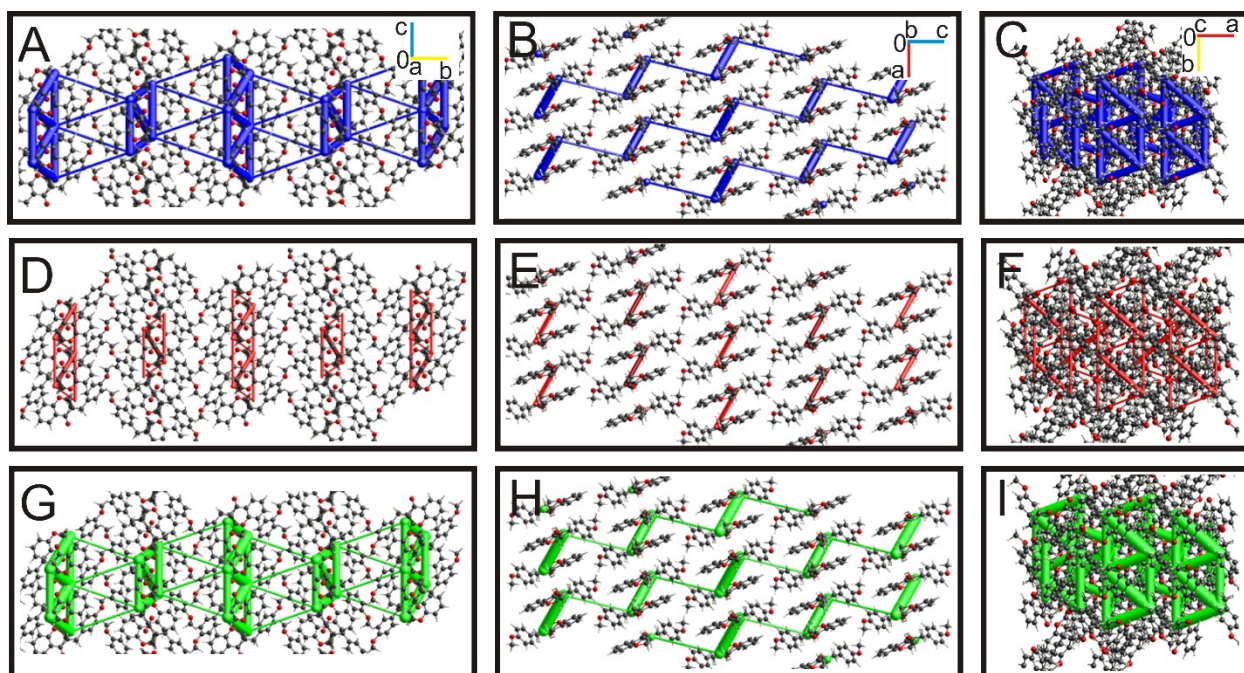

**Figure S4.** Energy frameworks for AFEWAL. The molecular arrangement of AFEWAL is viewed down the  $a$  (A, D, and G),  $b$  (B, E, and H), and  $c$  (C, F, and I) directions. The models are shown in ball-and-stick representation. The total interaction energies (A-C), electrostatic terms (D-F), and dispersion energy terms (G-I) are shown in blue, red, and green colors, respectively.

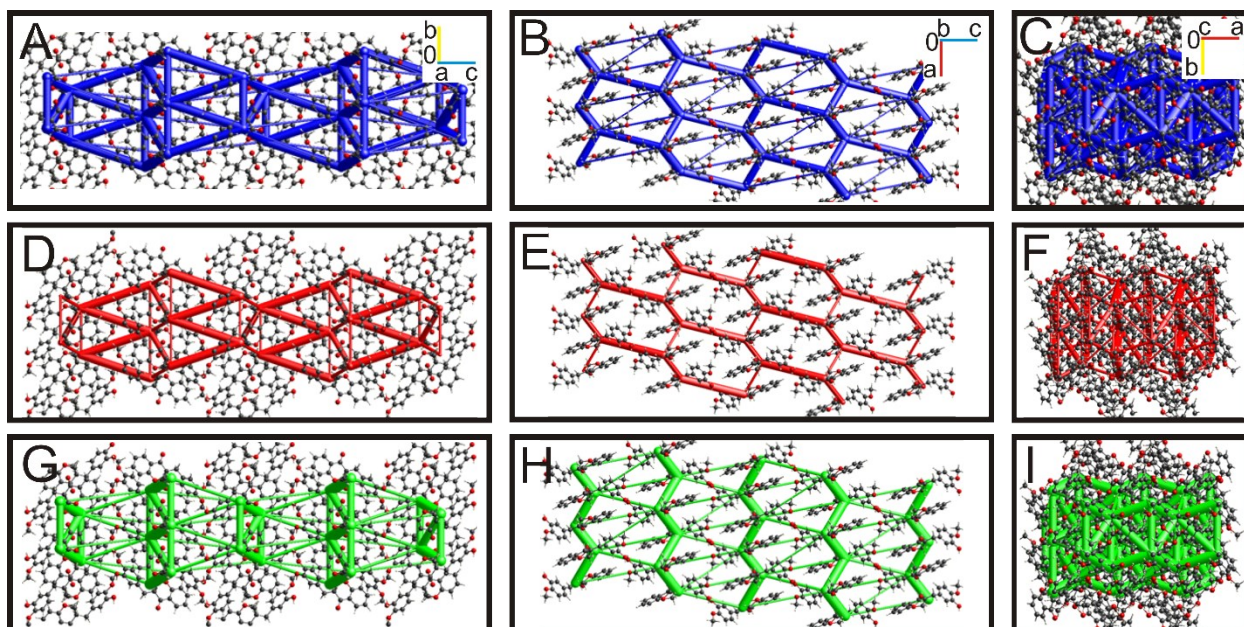

**Figure S5.** Energy frameworks for ECUFOA. The molecular arrangement of ECUFOA is viewed down the  $a$  (A, D, and G),  $b$  (B, E, and H), and  $c$  (C, F, and I) directions. The models are shown

in ball-and-stick representation. The total interaction energies (A-C), electrostatic terms (D-F), and dispersion energy terms (G-I) are shown in blue, red, and green colors, respectively.

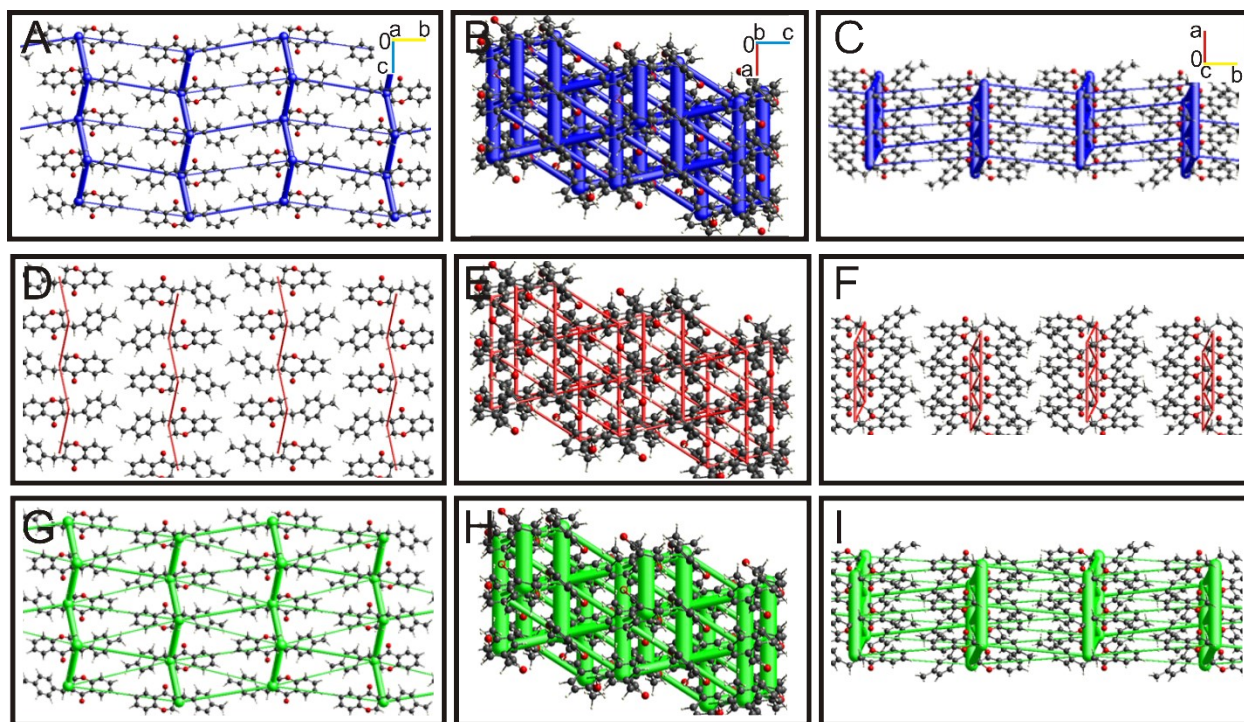

**Figure S6.** Energy frameworks for ECUFUG. The molecular arrangement of ECUFUG is viewed down the  $a$  (A, D, and G),  $b$  (B, E, and H), and  $c$  (C, F, and I) directions. The models are shown in ball-and-stick representation. The total interaction energies (A-C), electrostatic terms (D-F), and dispersion energy terms (G-I) are shown in blue, red, and green colors, respectively.
